# Supplementary material for: Cystatin C Plays a Sex-Dependent Detrimental Role in Experimental Autoimmune Encephalomyelitis
Source: PubMed Central journal article supplement — Cell Rep. Author manuscript; Available in PMC 2021 Nov 19. (PMC8603395; doi:10.1016/j.celrep.2020.108236), 2020-10-06
Supplement: NIHMS1755268-supplement-1.pdf [file NIHMS1755268-supplement-1.pdf]

**Cell Reports, Volume 33**

**Supplemental Information**

**Cystatin C Plays a Sex-Dependent Detrimental  
Role in Experimental Autoimmune Encephalomyelitis**

**Vahid Hoghooghi, Alexandra L. Palmer, Ariana Frederick, Yulan Jiang, Jessica E. Merkens, Anjali Balakrishnan, Trisha M. Finlay, Anders Grubb, Efrat Levy, Paul Gordon, Frank R. Jirik, Minh Dang Nguyen, Carol Schuurmans, Frank Visser, Shannon E. Dunn, and Shalina S. Ousman**

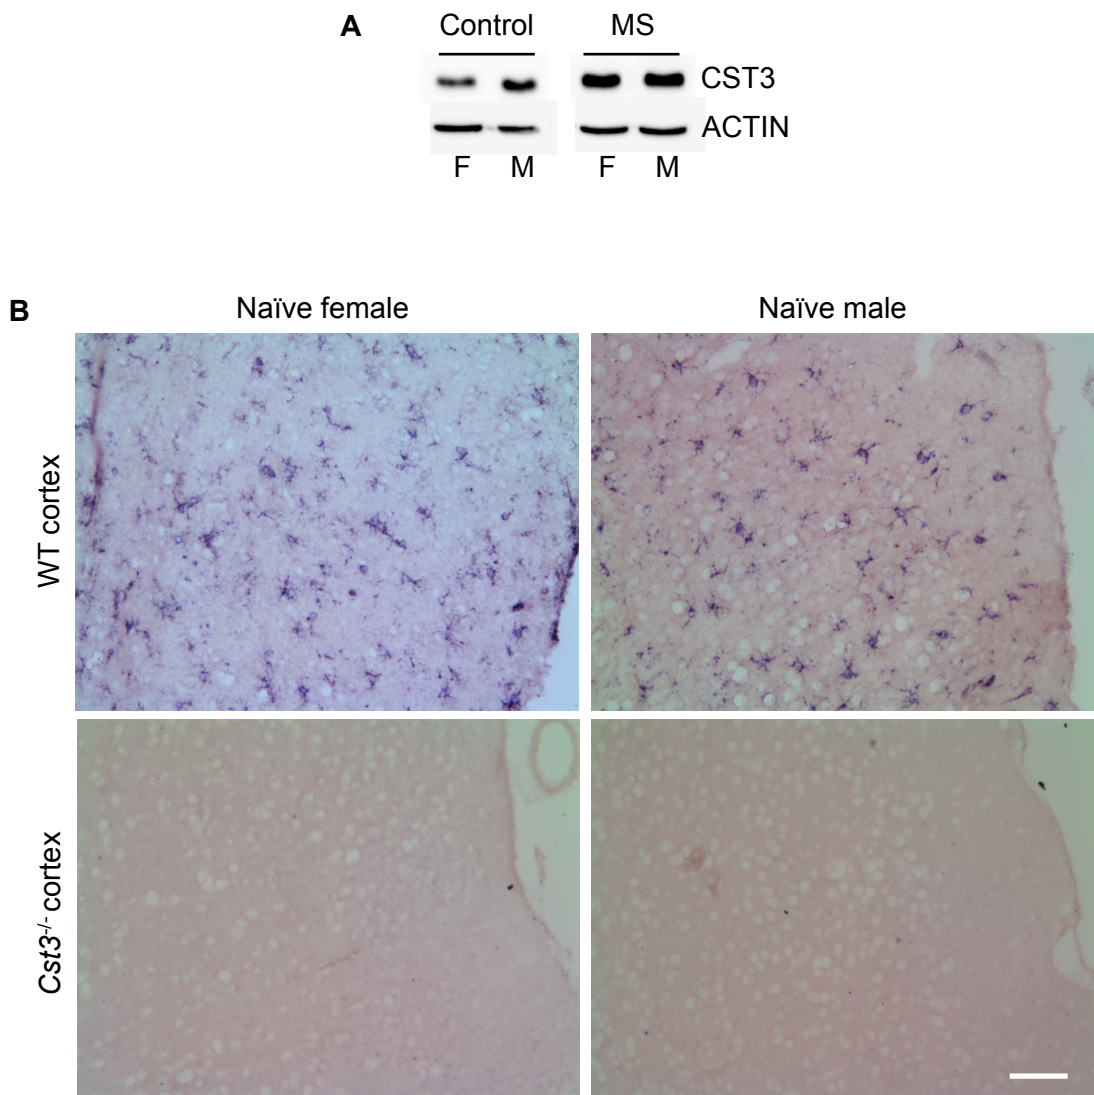

**Figure S1. CST3 protein and *Cst3* mRNA in MS and mouse brains,**  
 Related to Figure 1  
 (A) CST3 protein level in the brains of a female (F) and a male (M) control subject and MS patient.  
 (B) Micrographs (Bar = 50µm) of *Cst3* mRNA expression in the cortex of naive female and male WT and *Cst3*<sup>-/-</sup> mice.

Figure S2

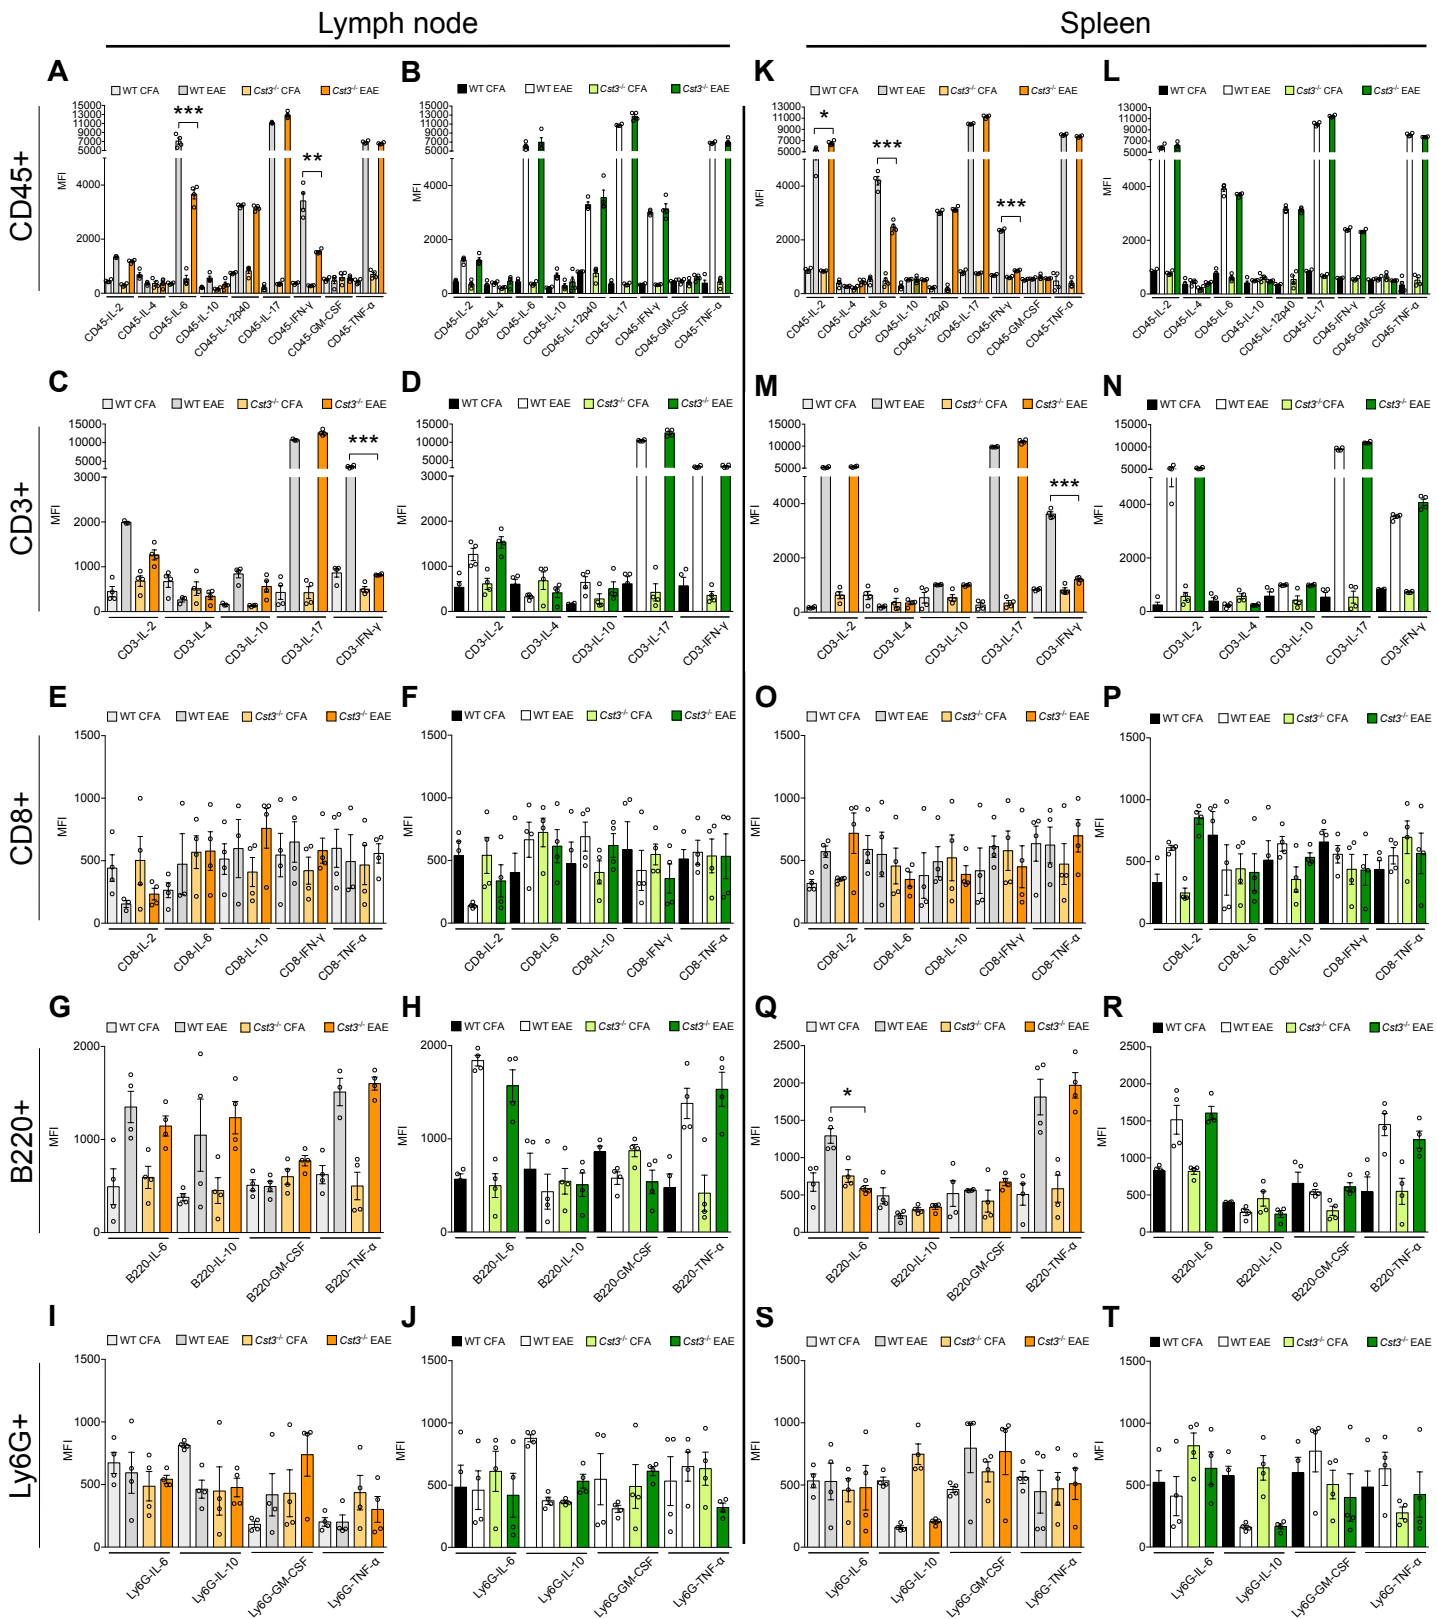

**Figure S2. CST3 promotes IL-6 and IFN- $\gamma$  cytokine expression in lymph node and spleen-derived immune cells from female mice with EAE, Related to Figure 3.**

(A-T) Mean fluorescent intensity of various cytokines present within CD45<sup>+</sup> (A, B, K, L), CD3<sup>+</sup> (C, D, M, N), CD8<sup>+</sup> (E, F, O, P), B220<sup>+</sup> (G, H, Q, R), and Ly6G<sup>+</sup> (I, J, S, T) lymph node (A-J) and spleen-derived immune cells (K-T) from female (A, C, E, G, I, K, M, O, Q, S) and male (B, D, F, H, J, L, N, P, R, T) WT (grey/white/black bars) and *Cst3*<sup>-/-</sup> (orange/green bars) CFA and EAE mice. Data shown as mean  $\pm$  SEM and represent 4 individual animals per group. One-way ANOVA with Šídák post hoc test, \*P<0.05, \*\*P<0.01, \*\*\*P<0.001.

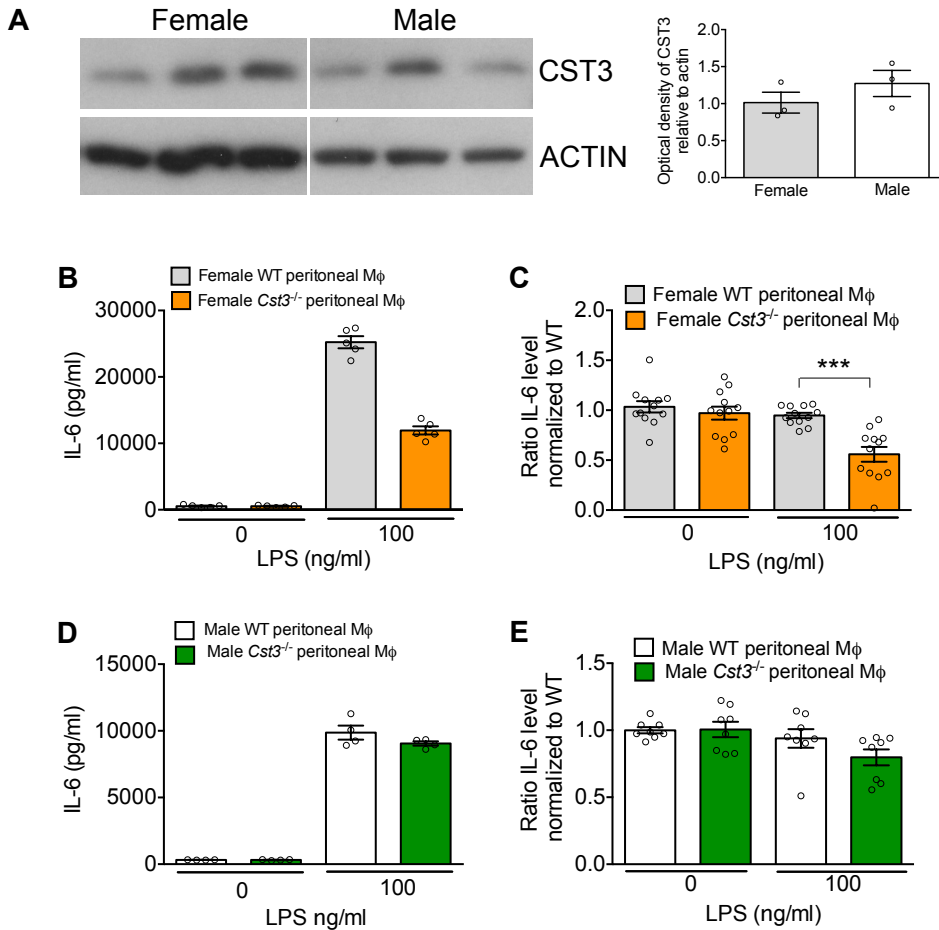

**Figure S3. CST3 expression and IL-6 secretion by CD11b<sup>+</sup> cells, Related to Figure 5.**

(A) Western blot and semi-quantification of CST3 protein level in female and male splenic EAE CD11b<sup>+</sup> cells. Each lane represents an individual mouse. Data represented as mean  $\pm$  SEM, n=3 mice/group, 2-tailed unpaired Student's *t*-test.

(B-E) IL-6 production by female (B, C) and male (D, E) WT (grey/white) and *Cst3*<sup>-/-</sup> (orange/green) peritoneal macrophages stimulated with LPS. Data represent an individual experiment (B, D) or the combination of 2 separate experiments (C, E) with each experiment consisting of cells pooled from 3 or 5 mice for each group and triplicate wells plated for each condition. Each dot represents each well and indicates the ratio of that well normalized to its corresponding WT condition. Data represented as mean  $\pm$  SEM, two-tailed unpaired Student's *t*-test, \*P<0.05, \*\*P<0.01, \*\*\*P<0.001.

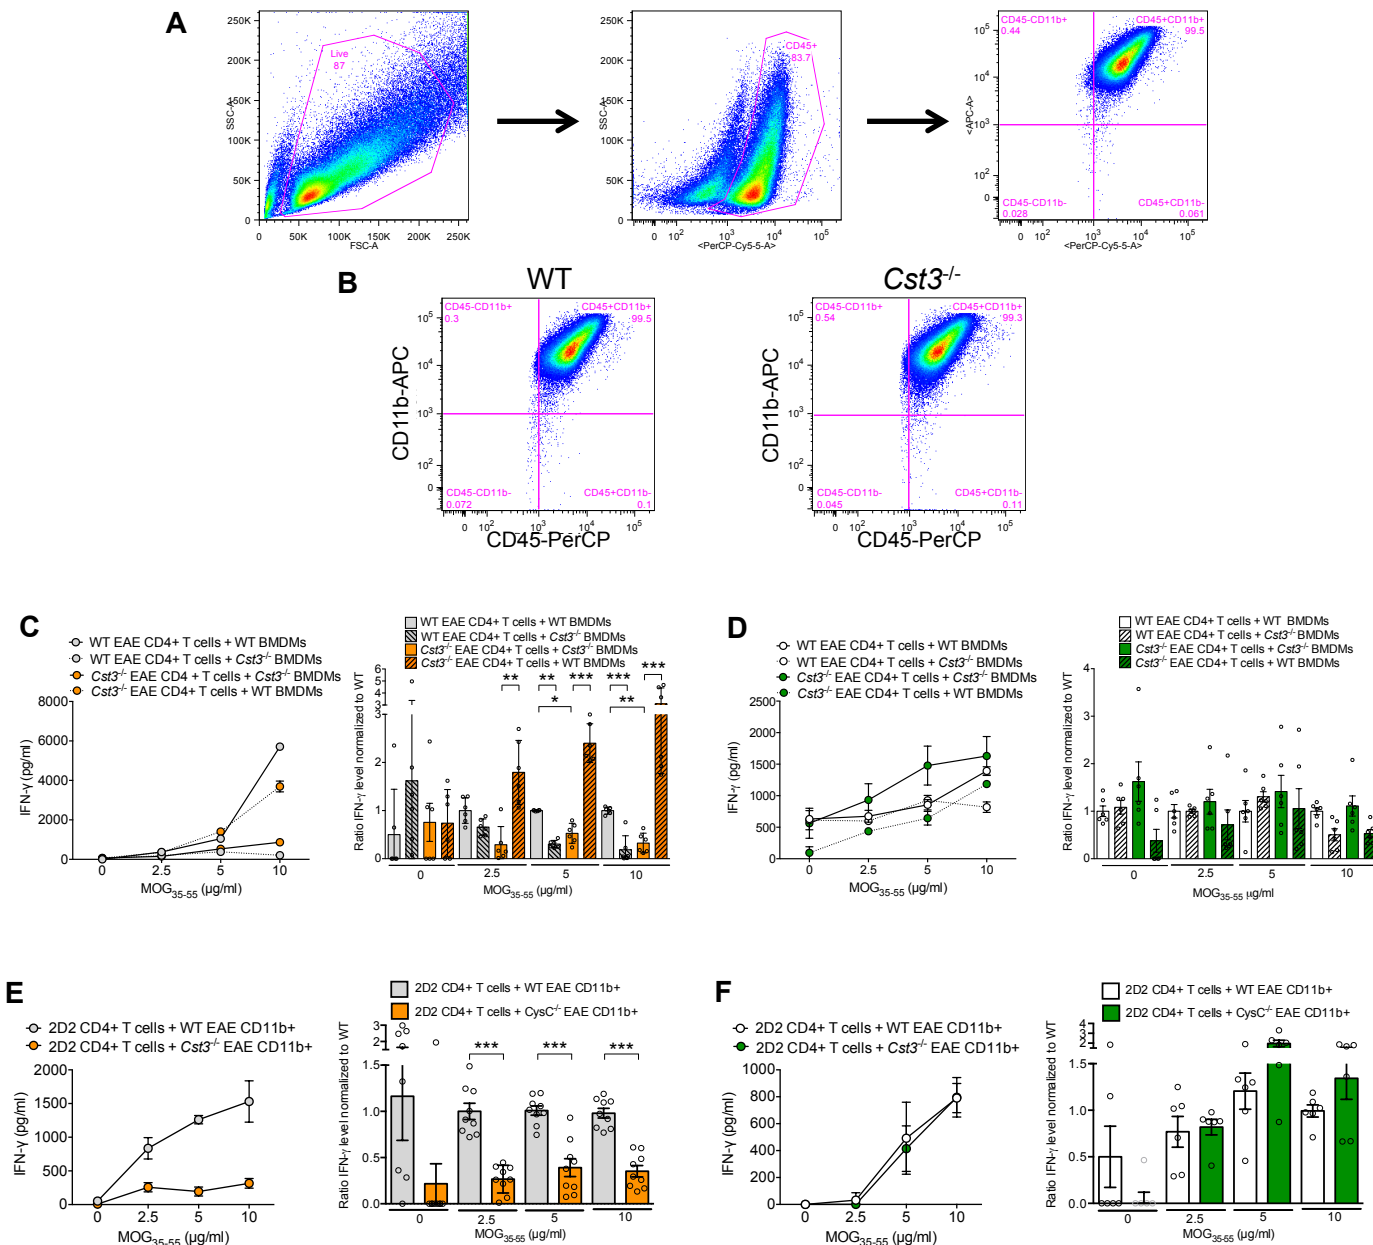

**Figure S4. CST3 promotes activation of antigen presenting cells in female EAE mice, Related to Figure 5.**

(A) Gating strategy and (B) purity of CD11b<sup>+</sup> BMDMs from WT and *Cst3*<sup>-/-</sup> female mice. Plots represent pooled cells from two mice from each genotype.

(C-F) IFN- $\gamma$  secretion by female (grey/orange) and male (white/green) WT (grey/white) and *Cst3*<sup>-/-</sup> (orange/green) spleen-derived EAE CD4<sup>+</sup> T cells (C, D) or 2D2 CD4<sup>+</sup> T cells (E, F) co-cultured with syngeneic (solid bars) or alternate genotype (patterned bars) BMDMs (C, D) or EAE CD11b<sup>+</sup> cells (E, F). Line graphs depict an individual experiment that consisted of cells pooled from 3 or 5 mice for each group and triplicate wells plated for each condition. Bar graphs represent the combination of 3 separate experiments. Each dot represents each well and indicates the ratio of that well normalized to its corresponding WT condition. Data presented as mean  $\pm$  SEM, one-way ANOVA with Šídák post hoc test, \**P*<0.05, \*\**P*<0.01, \*\*\**P*<0.001.

Figure S5

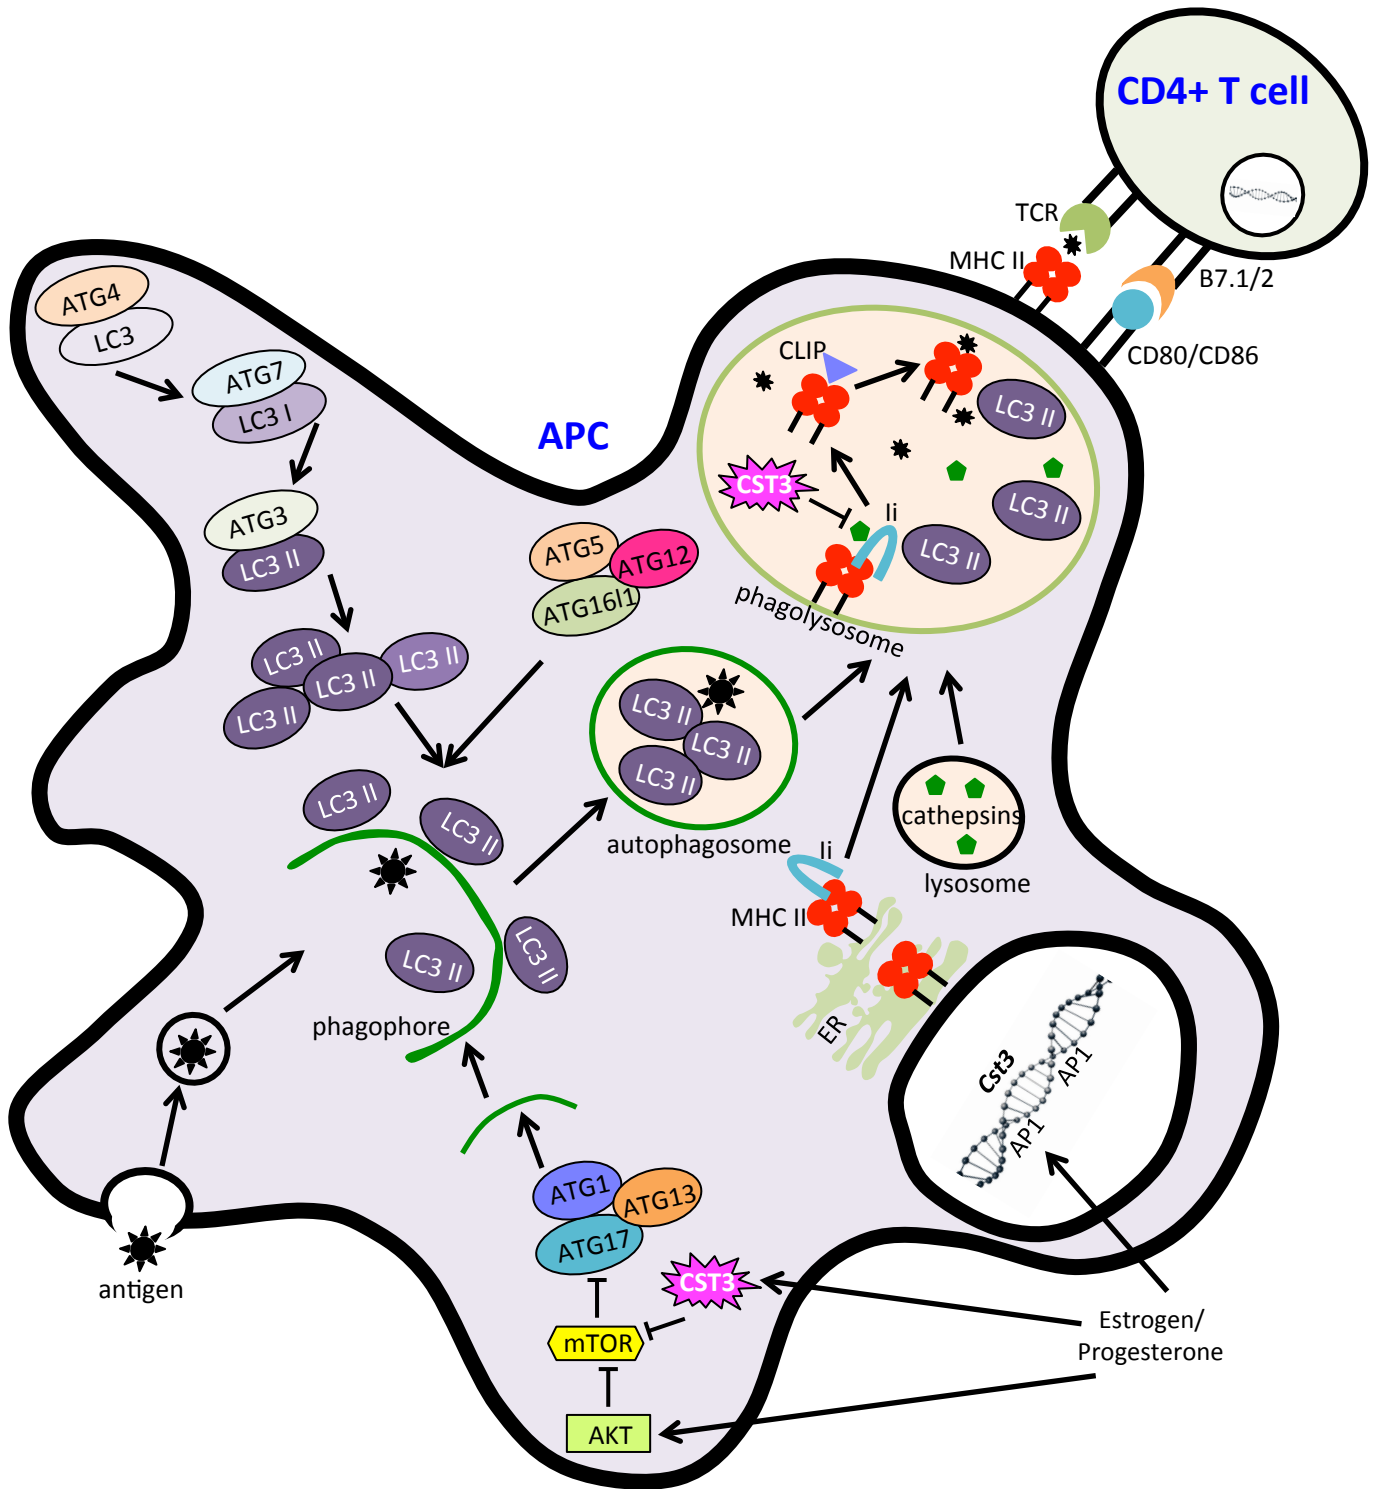

**Figure S5. Schematic diagram showing the molecular players in antigen presentation and autophagy-mediated antigen processing and loading,** Related to Figure 6A, B.

Macroautophagy is a mechanism that degrades damaged or aged organelles as well as intracellular or extracellular antigens. Inhibition of mTOR by AKT or CST3 mediates activation of the Atg13/Atg17/Atg1 complex that induces autophagosome formation. During phagophore elongation, an Atg4/Atg7/Atg3 complex promotes the conversion of LC3I to LC3II that relocates from the cytosol to the surfaces of autophagic membranes. Extracellular antigen is engulfed by endosomes or endocytic vesicles and transferred to autophagic membranes (autophagosomes) that fuse with lysosomes to form phagolysosomes. Here, antigens are processed by lysosomal enzymes (such as cathepsins B or S) and loaded onto MHC II molecules. CST3 controls the activity of cathepsins to prevent complete degradation of antigens. The autophagic cargo is then exocytosed to the plasma membrane and the antigen is presented via MHC II to TCRs on CD4<sup>+</sup> T cells. Co-stimulation via binding of CD80 and CD86 to B7.1/2 co-stimulatory molecules is required to promote full activation of T cells. (*Patterson and Mintern, 2012, Protein and Cell; Wang and Muller, 2015, Front Immunol; Khan and Ahmed, 2015, Front Immunol*).



**Figure S6**

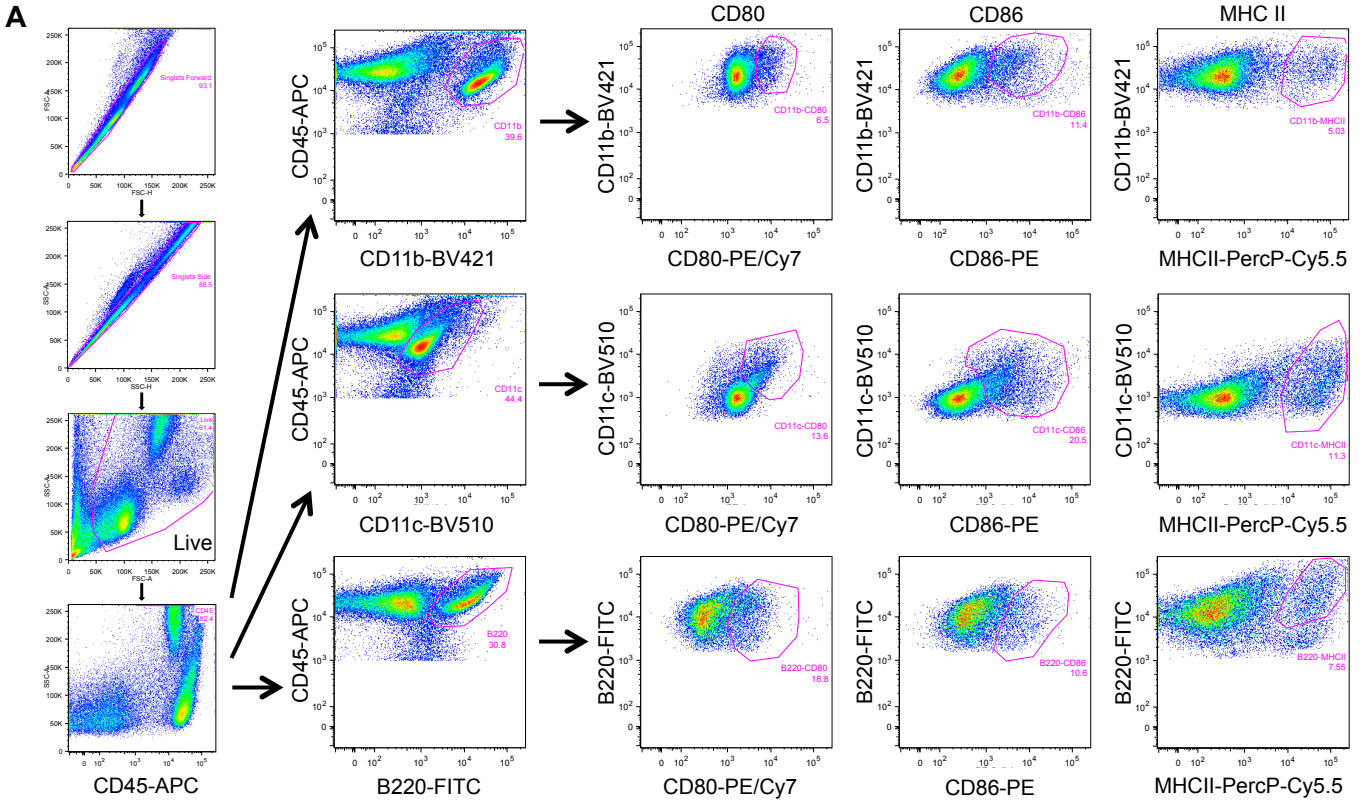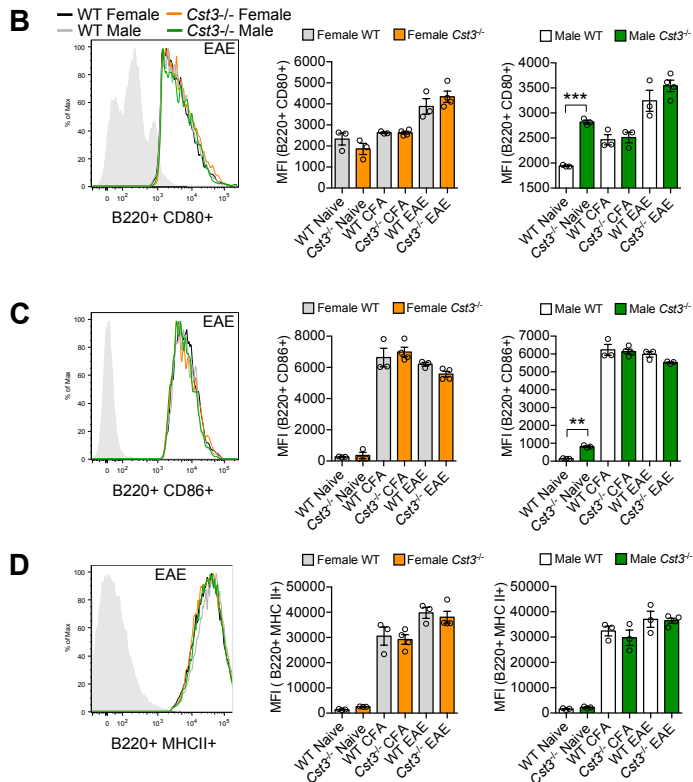

**Figure S6. Gating strategy and expression of antigen presenting markers in B220<sup>+</sup> cells,** Related to Figure 6.

(A) Gating strategy for antigen presentation molecular markers.

(B-D) Mean fluorescent intensity of CD80 (B), CD86 (C) and MHC II (D) expression in female (grey/orange) and male (white/green) WT (grey/white bars) and *Cst3<sup>-/-</sup>* (orange/green bars) spleen-derived B220<sup>+</sup> cells from naïve, CFA and EAE mice. Data represented as mean ± SEM and represent 3-4 individual animals per group. One-way ANOVA with Šídák post hoc test, \*\*P<0.01, \*\*\*P<0.001.

**Figure S7**

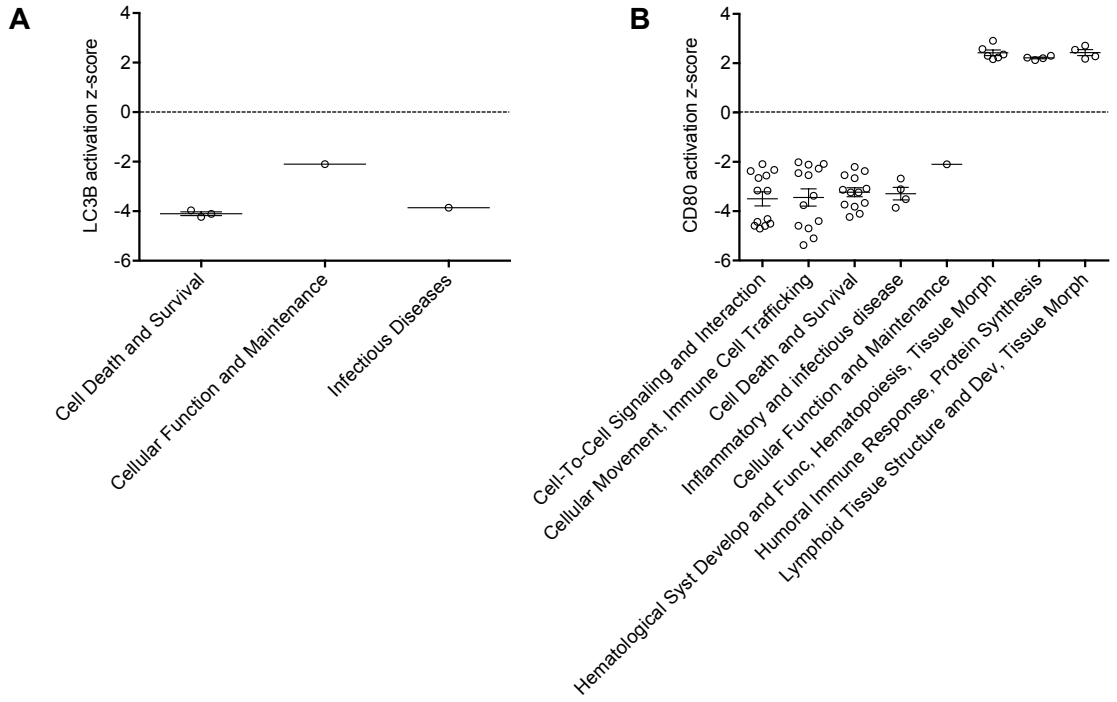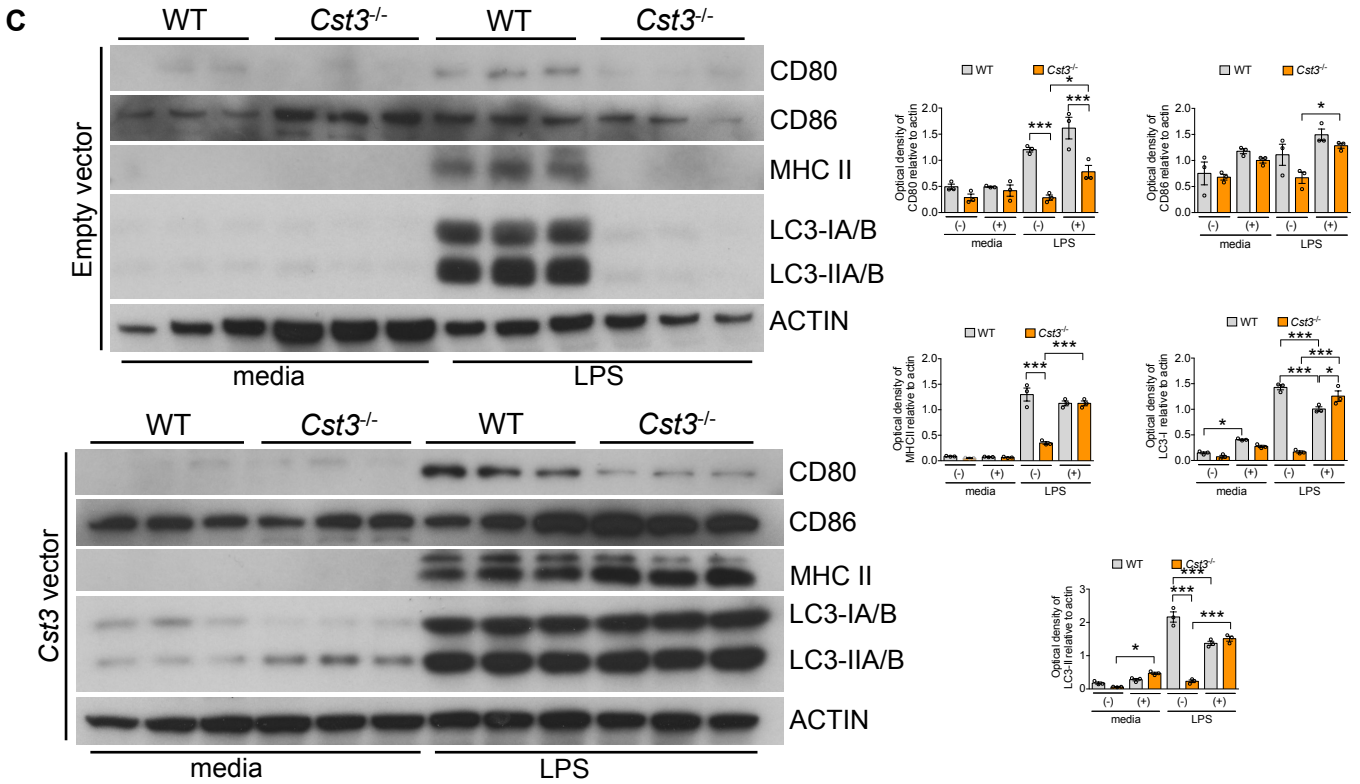

**Figure S7. CST3 regulates expression of antigen presentation markers in female CD11b<sup>+</sup> cells,** Related to Figure 6, Table S4.

(A-B) The number of times that LC3B (A) and CD80 (B) were present in functional pathways that were decreased (negative z-score) or increased (positive z-score) in female *Cst3*<sup>-/-</sup> EAE CD11b<sup>+</sup> cells relative to their male counterparts.

(C) Western blots and semi-quantification of CD80, CD86, MHC II and LC3A/B1/II levels in female WT and *Cst3*<sup>-/-</sup> BMDMs transfected with empty or *Cst3* vector ± LPS. Data represent one of two experiments with graphs displaying the mean ± SEM of 3 individual mice. Two-way ANOVA with Tukey post-hoc test, \*P<0.05, \*\*P<0.01, \*\*\*P<0.001.

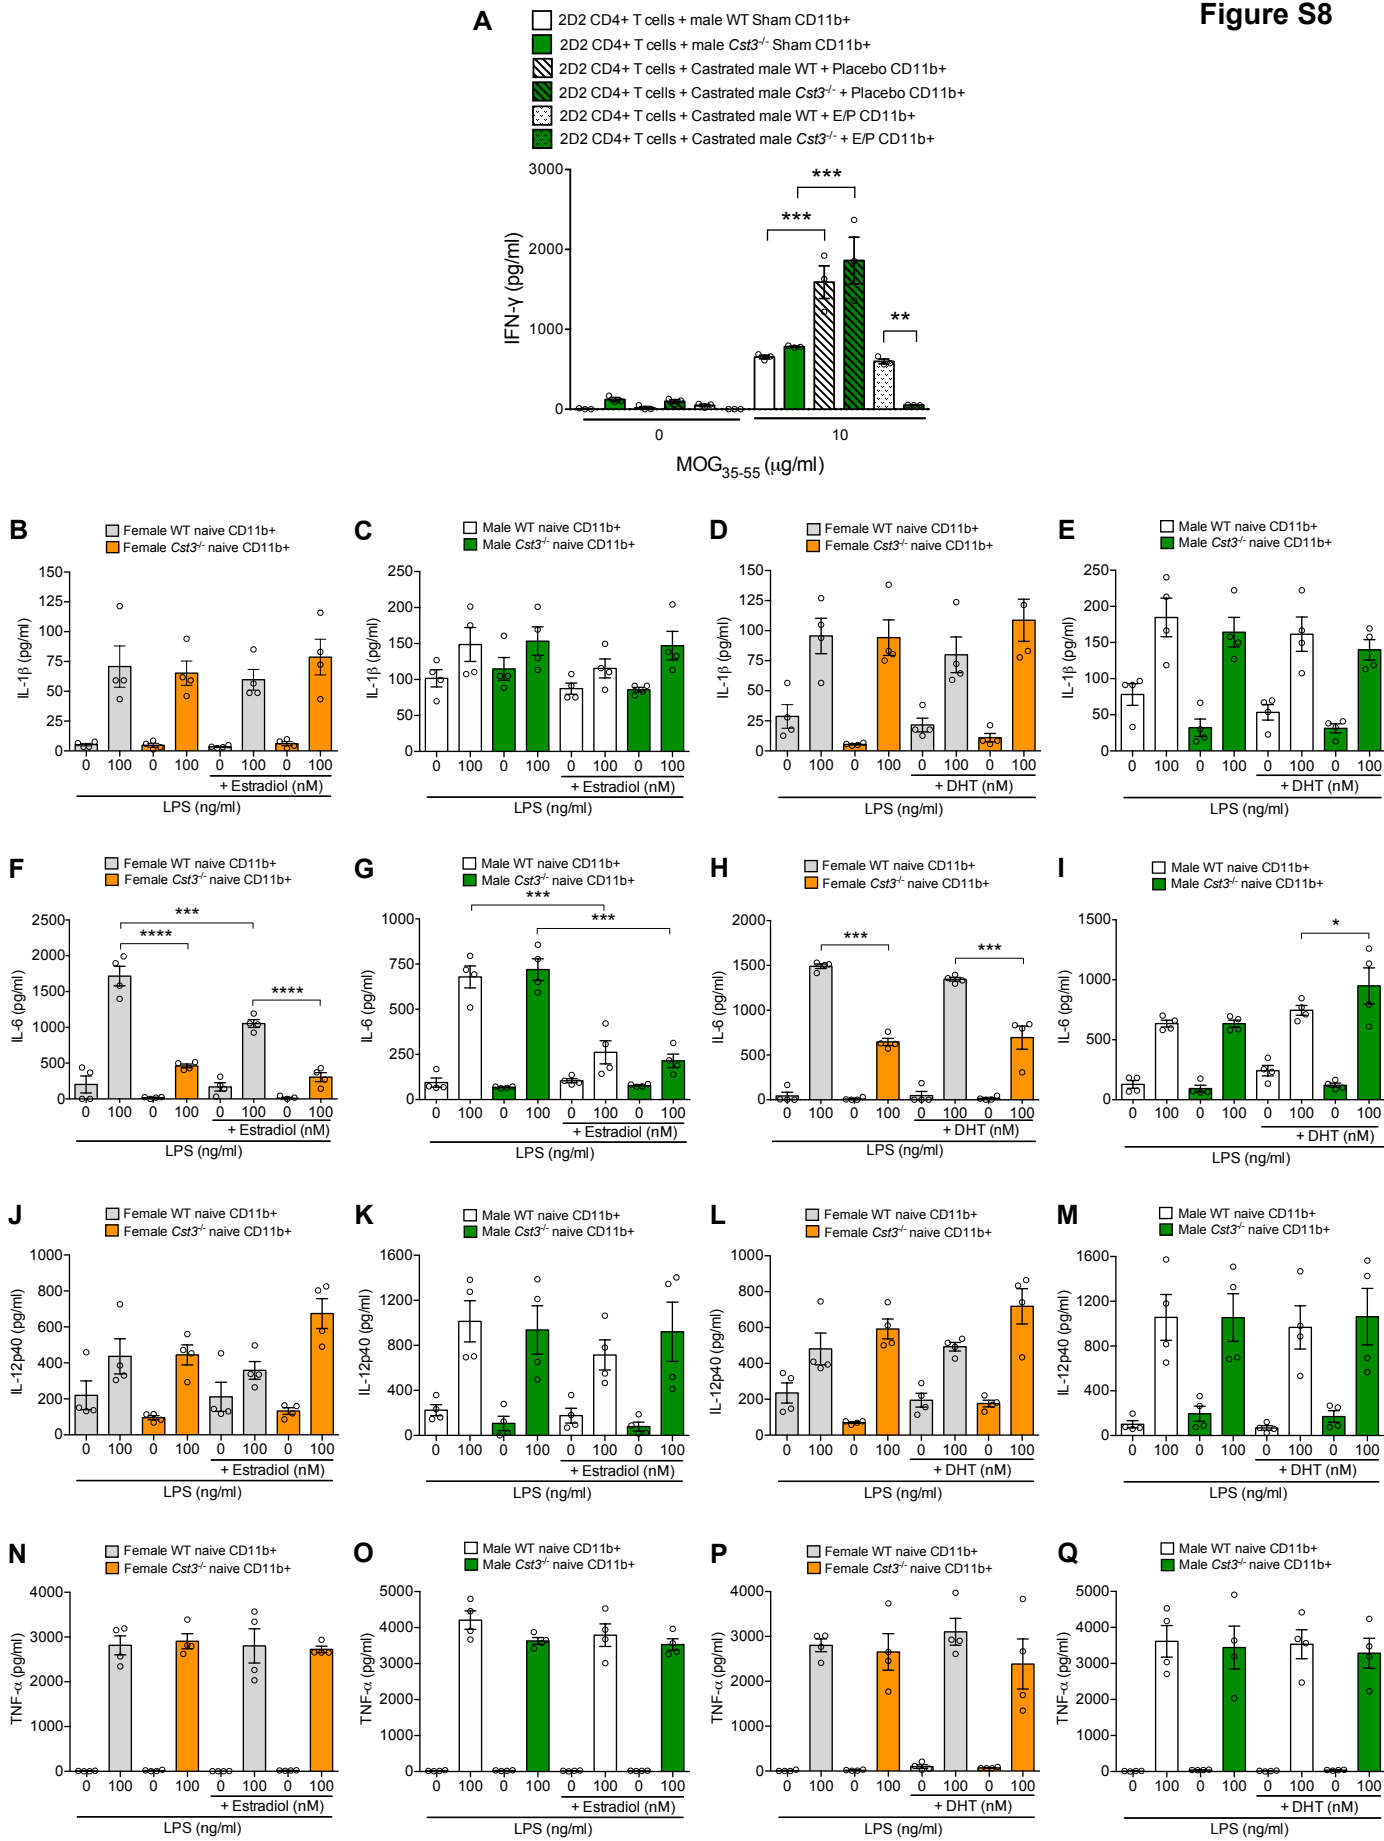

**Figure S8. Estrogen contributes to CST3's sex-dependent effect on activation of CD11b<sup>+</sup> cells**, Related to Figure 7.

(A) Secretion of IFN- $\gamma$  by MOG<sub>35-55</sub>-stimulated male 2D2 CD4<sup>+</sup> T cells co-cultured with splenic-derived CD11b<sup>+</sup> cells from sham (open bars), castrated + placebo (stripes) or castrated + estrogen/progesterone (dots)-treated male WT (grey) and *Cst3*<sup>-/-</sup> (green) EAE animals at d40 post-immunization. Data presented as mean  $\pm$  SEM with three individual mice per condition and triplicate wells plated for each mouse; one-way ANOVA with Šídák post-hoc test.

(B-Q) IL-1 $\beta$  (B-E), IL-6 (F-I), IL-12p40 (J-M) and TNF- $\alpha$  (N-Q) production by splenic CD11b<sup>+</sup> cells from naive female (B, D, F, H, J, L, N, P) and male (C, E, G, I, K, M, O, Q) WT (grey/white) and *Cst3*<sup>-/-</sup> (orange/green) mice cultured with 17- $\beta$  estradiol or DHT  $\pm$  LPS. Data represented as mean  $\pm$  SEM with four individual mice per condition; two-way ANOVA with Šídák post hoc test; \*P<0.05, \*\*P<0.01, \*\*\*P<0.001.

**Table S1. Characteristics of MS brain samples acquired from the UK MS Tissue Bank, Related to Figure 1**

| <b>MS Sample</b> | <b>Sex</b> | <b>Age</b> | <b>Type of MS</b> | <b>Brain area</b>                           | <b>Lesion Type</b>                              |
|------------------|------------|------------|-------------------|---------------------------------------------|-------------------------------------------------|
| CO26             | F          | 78         | control           | Occipital cortex                            |                                                 |
| CO25             | M          | 35         | control           | Occipital periventricular white matter      |                                                 |
| MS562            | F          | 62         | SPMS              | Frontal cortex with underlying white matter | Late chronic active to inactive; shadow plaques |
| MS335            | M          | 62         | SPMS              | Frontal cortex and white matter             | Inactive; shadow plaques                        |

**Table S2: Incidence, mean day of onset and cumulative mean score of WT vs *Cst3*<sup>-/-</sup> EAE mice, Related to Figure 1**

|                                   | Incidence | Mean day of onset | Cumulative mean score |
|-----------------------------------|-----------|-------------------|-----------------------|
| Female WT                         | 29/29     | 10.5 ± 0.75       | 2.87 ± 0.87           |
| Female <i>Cst3</i> <sup>-/-</sup> | 26/29     | 16.4 ± 1.65       | 0.88 ± 0.34***        |
| Male WT                           | 25/25     | 9.4 ± 0.63        | 2.40 ± 0.38           |
| Male <i>Cst3</i> <sup>-/-</sup>   | 25/25     | 12.1 ± 0.6        | 1.94 ± 0.44^^         |

Values are means ± SEM; \*\*/^^P<0.01, \*\*\*/^^^P<0.001, 2-tailed unpaired Student's *t*-test, n=25-29 mice per group; Comparisons made: \*=female WT vs female *Cst3*<sup>-/-</sup>, ^=male WT vs male *Cst3*<sup>-/-</sup>



**Table S3: Incidence, mean day of onset and cumulative mean score of WT vs Cst3Tg EAE mice, Related to Figure 1**

|               | <b>Incidence</b> | <b>Mean day of onset</b> | <b>Cumulative mean score</b> |
|---------------|------------------|--------------------------|------------------------------|
| Female WT     | 12/15            | 16.14 ± 1.33             | 1.03 ± 0.29                  |
| Female Cst3Tg | 15/15            | 10.62 ± 0.86             | 1.76 ± 0.34***               |
| Male WT       | 14/15            | 10.12 ± 0.9              | 1.67 ± 0.37                  |
| Male Cst3Tg   | 15/15            | 9.75 ± 0.63              | 1.78 ± 0.25                  |

Values are means ± SEM; \*\*\*/^^^P<0.001, 2-tailed unpaired Student's *t*-test, n=15 mice per group; Comparisons made: \*=female WT vs female Cst3Tg, ^=male WT vs male Cst3Tg

**Table S4: Presence of CD80 and LC3B in functional pathways that were altered in female *Cst3<sup>-/-</sup>* EAE CD11b<sup>+</sup> cells relative to their male counterparts, Related to Figure 6, Figure S7A, B**

| <b>CD80</b>                                                                                                 |                                            |                |                           |        |
|-------------------------------------------------------------------------------------------------------------|--------------------------------------------|----------------|---------------------------|--------|
| <b>DECREASED</b>                                                                                            | <b>FUNCTION</b>                            | <b>P VALUE</b> | <b>ACTIVATION Z SCORE</b> |        |
| Cell-To-Cell Signaling and Interaction                                                                      | Activation of myeloid cells                | 1.57e-15       | -4.701                    |        |
|                                                                                                             | Activation of phagocytes                   | 1.09e-17       | -4.594                    |        |
|                                                                                                             | Activation of blood cells                  | 1.6e-17        | -4.594                    |        |
|                                                                                                             | Activation of leukocytes                   | 8.35e-29       | -4.507                    |        |
|                                                                                                             | Activation of antigen presenting cells     | 4.14e-09       | -4.432                    |        |
|                                                                                                             | Activation of cells                        | 1.14e-27       | -4.314                    |        |
|                                                                                                             | Immune response of leukocytes              | 4.83e-19       | -3.17                     |        |
|                                                                                                             | Stimulation of cells                       | 7.39e-09       | -3.163                    |        |
|                                                                                                             | Interaction of tumor cell lines            | 2.48e-11       | -2.656                    |        |
|                                                                                                             | Binding of tumor cell lines                | 1.01e-11       | -2.551                    |        |
|                                                                                                             | Response of mononuclear leukocytes         | 1e-11          | -2.328                    |        |
|                                                                                                             | Activation of mononuclear leukocytes       | 1.18e-20       | -2.328                    |        |
|                                                                                                             | Interaction of blood cells                 | 6e-19          | -2.091                    |        |
|                                                                                                             | Cell Death and Survival                    | Cell viability | 6.63e-17                  | -4.23  |
|                                                                                                             |                                            | Cell survival  | 2.46e-18                  | -4.106 |
| Cell death of lymphocytes                                                                                   |                                            | 4.54e-15       | -3.812                    |        |
| Cell death of mononuclear leukocytes                                                                        |                                            | 4.56e-16       | -3.728                    |        |
| Cell death of lymphoid cells                                                                                |                                            | 2.2e-15        | -3.663                    |        |
| Apoptosis of lymphocytes                                                                                    |                                            | 6.28e-13       | -3.236                    |        |
| Cell death of lymphatic system cells                                                                        |                                            | 2.44e-16       | -3.237                    |        |
| Apoptosis of mononuclear leukocytes                                                                         |                                            | 6.5e-14        | -3.13                     |        |
| Apoptosis of lymphoid cells                                                                                 |                                            | 2.7e-13        | -3.085                    |        |
| Apoptosis of lymphatic system cells                                                                         |                                            | 4.96e-14       | -2.658                    |        |
| Cell death of immune cells                                                                                  |                                            | 3.12e-28       | -2.538                    |        |
| Apoptosis of leukocytes                                                                                     |                                            | 4.93e-18       | -2.372                    |        |
| Apoptosis of blood cells                                                                                    |                                            | 2.22e-19       | -2.204                    |        |
| Cellular Movement, Immune Cell Trafficking                                                                  | Migration of cells                         | 2.99e-27       | -5.37                     |        |
|                                                                                                             | Cell movement                              | 4.73e-30       | -5.103                    |        |
|                                                                                                             | Cell movement of phagocytes                | 3.15e-18       | -4.694                    |        |
|                                                                                                             | Leukocyte migration                        | 5.62e-30       | -4.694                    |        |
|                                                                                                             | Cell movement of leukocytes                | 3.31e-24       | -4.402                    |        |
|                                                                                                             | Cell movement of mononuclear leukocytes    | 5.82e-10       | -3.758                    |        |
|                                                                                                             | Migration of mononuclear leukocytes        | 2.42e-08       | -3.372                    |        |
|                                                                                                             | Migration of phagocytes                    | 1.76e-09       | -2.538                    |        |
|                                                                                                             | Cellular infiltration by leukocytes        | 8.29e-13       | -2.453                    |        |
|                                                                                                             | Infiltration by leukocytes                 | 2.38e-13       | -2.275                    |        |
|                                                                                                             | Cell movement of lymphatic system cells    | 1.48e-08       | -2.11                     |        |
|                                                                                                             | Cell movement of lymphoid cells            | 1.88e-08       | -2.082                    |        |
|                                                                                                             | Cellular infiltration                      | 7.55e-16       | -2.017                    |        |
|                                                                                                             |                                            |                |                           |        |
|                                                                                                             | <b>INCREASED</b>                           |                |                           |        |
| Hematological System Development and Function, Lymphoid Tissue Structure and Development, Tissue Morphology | Quantity of T lymphocytes                  | 1.54e-20       | 2.912                     |        |
|                                                                                                             | Quantity of blood cells                    | 9.87e-47       | 2.575                     |        |
|                                                                                                             | Quantity of hematopoietic progenitor cells | 1.35e-24       | 2.352                     |        |
|                                                                                                             | Quantity of lymphocytes                    | 7.59e-36       | 2.299                     |        |
|                                                                                                             | Quantity of mononuclear leukocytes         | 1.65e-6        | 2.231                     |        |
| Humoral Immune Response, Protein Synthesis                                                                  | Quantity of leukocytes                     | 4.83e-41       | 2.168                     |        |
|                                                                                                             | Production of antibody                     | 1.86e-20       | 2.3                       |        |
|                                                                                                             | Quantity of IgG                            | 1.35e-15       | 2.228                     |        |
|                                                                                                             | Quantity of IgG2a                          | 2.89e-09       | 2.201                     |        |
|                                                                                                             | Quantity of immunoglobulin                 | 7.63e-21       | 2.13                      |        |

**Table S4: cont.**

|                                                              |                                    |                |                           |
|--------------------------------------------------------------|------------------------------------|----------------|---------------------------|
| Lymphoid Tissue Structure and Development, Tissue Morphology | Quantity of lymphatic system cells | 6.13e-40       | 2.715                     |
|                                                              | Quantity of lymphoid organ         | 4.62e-16       | 2.543                     |
|                                                              | Quantity of lymphoid tissue        | 8.96e-22       | 2.282                     |
|                                                              | Quantity of lymphoid cells         | 3.41e-36       | 2.181                     |
|                                                              |                                    |                |                           |
| <b>LC3B</b>                                                  |                                    |                |                           |
| <b>DECREASED</b>                                             | <b>FUNCTION</b>                    | <b>P VALUE</b> | <b>ACTIVATION Z SCORE</b> |
| Cell Death and Survival                                      | Cell viability                     | 3.91e-11       | -3.965                    |
|                                                              | Cell survival                      | 2.46e-18       | -4.106                    |
| Cellular Function and Maintenance                            | Cellular homeostasis               | 1.79e-21       | -2.101                    |
| Infectious Diseases                                          | Viral Infection                    | 2.67e-20       | -3.858                    |

**Table S5: Incidence, mean day of onset and cumulative mean score of ovariectomized female EAE mice administered testosterone, Related to Figure 7A, B**

|                                                                 | Incidence | Mean day of onset | Mean score     |
|-----------------------------------------------------------------|-----------|-------------------|----------------|
| Female WT sham                                                  | 10/10     | 8.90 ± 0.33       | 2.37 ± 0.25    |
| Ovariectomized female WT + Placebo                              | 10/10     | 10.2 ± 0.80       | 2.79 ± 0.43**  |
| Ovariectomized female WT + Testosterone                         | 10/10     | 10.8 ± 0.66       | 2.62 ± 0.47    |
| Female <i>Cst3</i> <sup>-/-</sup> sham                          | 4/8       | 15 ± 3.74         | 0.59 ± 0.35*** |
| Ovariectomized female <i>Cst3</i> <sup>-/-</sup> + Placebo      | 7/8       | 12.83 ± 1.68      | 1.67 ± 0.62*** |
| Ovariectomized female <i>Cst3</i> <sup>-/-</sup> + Testosterone | 8/8       | 13 ± 1.27         | 1.94 ± 0.55**  |

Values are means ± SEM; \*\* P<0.01, \*\*\*P<0.001, 2-tailed unpaired Student's *t*-test, n=8-10 mice per group; each group is compared to WT sham

**Table S6: Incidence, mean day of onset and cumulative mean score of castrated male EAE mice administered estrogen/progesterone, Related to Figure 7A, B**

|                                                                       | Incidence | Mean day of onset | Mean score     |
|-----------------------------------------------------------------------|-----------|-------------------|----------------|
| Male WT sham                                                          | 10/10     | 7.7 ± 0.16        | 2.48 ± 0.21    |
| Castrated male WT + Placebo                                           | 10/10     | 7.8 ± 0.14        | 2.70 ± 1.09*   |
| Castrated male WT + Estradiol/<br>Progesterone                        | 9/10      | 23 ± 1.93         | 1.09 ± 0.48*** |
| Male <i>Cst3<sup>-/-</sup></i> sham                                   | 8/9       | 13.25 ± 1.86      | 1.86 ± 0.48*** |
| Castrated male <i>Cst3<sup>-/-</sup></i> + Placebo                    | 9/9       | 15.44 ± 1.91      | 1.90 ± 0.48*** |
| Castrated male <i>Cst3<sup>-/-</sup></i> + Estradiol/<br>Progesterone | 5/9       | 30 ± 0.35         | 0.35 ± 0.34*** |

Values are means ± SEM; \*P<0.05, \*\*\*P<0.001, Student's *t*-test, n=8-10 mice per group; each group is compared to WT sham
